# Supplementary material for: Cell cycle reentry triggers hyperploidization and synaptic dysfunction followed by delayed cell death in differentiated cortical neurons
Source: PubMed Central journal article supplement (PMC6156334; doi:10.1038/s41598-018-32708-4), 2018-09-25
Supplement: 41598_2018_32708_MOESM1_ESM.pdf [file 41598_2018_32708_MOESM1_ESM.pdf]

## **SUPPLEMENTARY INFORMATION**

### **Cell cycle reentry triggers hyperploidization and synaptic dysfunction followed by delayed cell death in differentiated cortical neurons**

Estíbaliz Barrio-Alonso<sup>1</sup>, Alicia Hernández-Vivanco<sup>2</sup>, Chaska C. Walton<sup>1</sup>,  
Gertrudis Perea<sup>2</sup>, and José M. Frade<sup>1</sup>

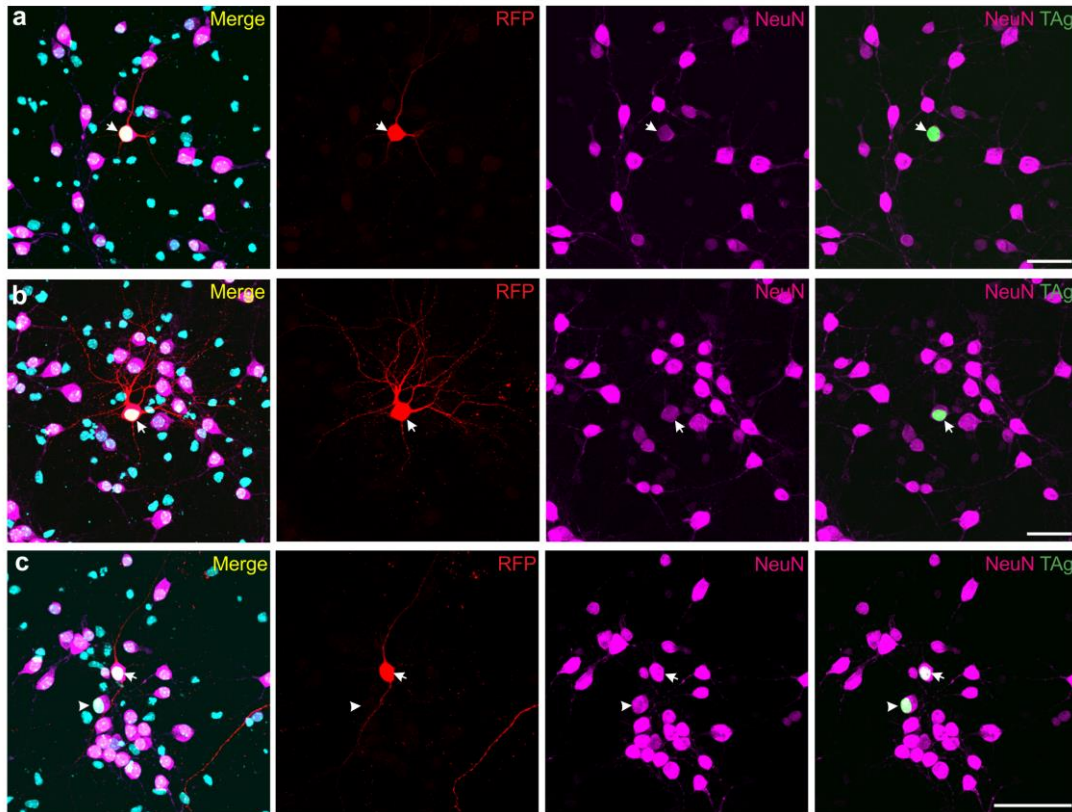

**Figure S1. All RFP-positive neurons express TAg in RFP/TAg double transfected cultures.** (a-c) Examples of RFP/TAg-transfected cortical neurons (arrows) after 3 dpt, immunolabeled with antibodies against NeuN (purple) and TAg (green). DAPI is shown in blue. All RFP-positive neurons co-express TAg. Note that TAg can occasionally be detected in RFP-negative neurons (arrowhead). Bars: 40  $\mu$ m.

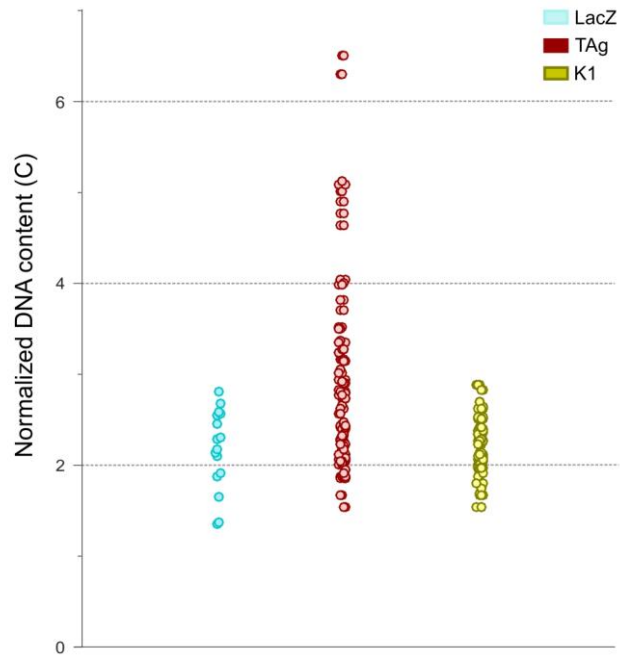

**Figure S2. TAg K1-expression cannot induce hyperploidy in cortical neurons.**

DNA content in RFP-positive LacZ-, TAg-, or TAg K1-transfected cortical neurons, normalized to the average DNA content in non-transfected cortical neurons from the same microscopic field, at 2dpt. Each dot represents the normalized DNA content for a single NeuN-positive nucleus.

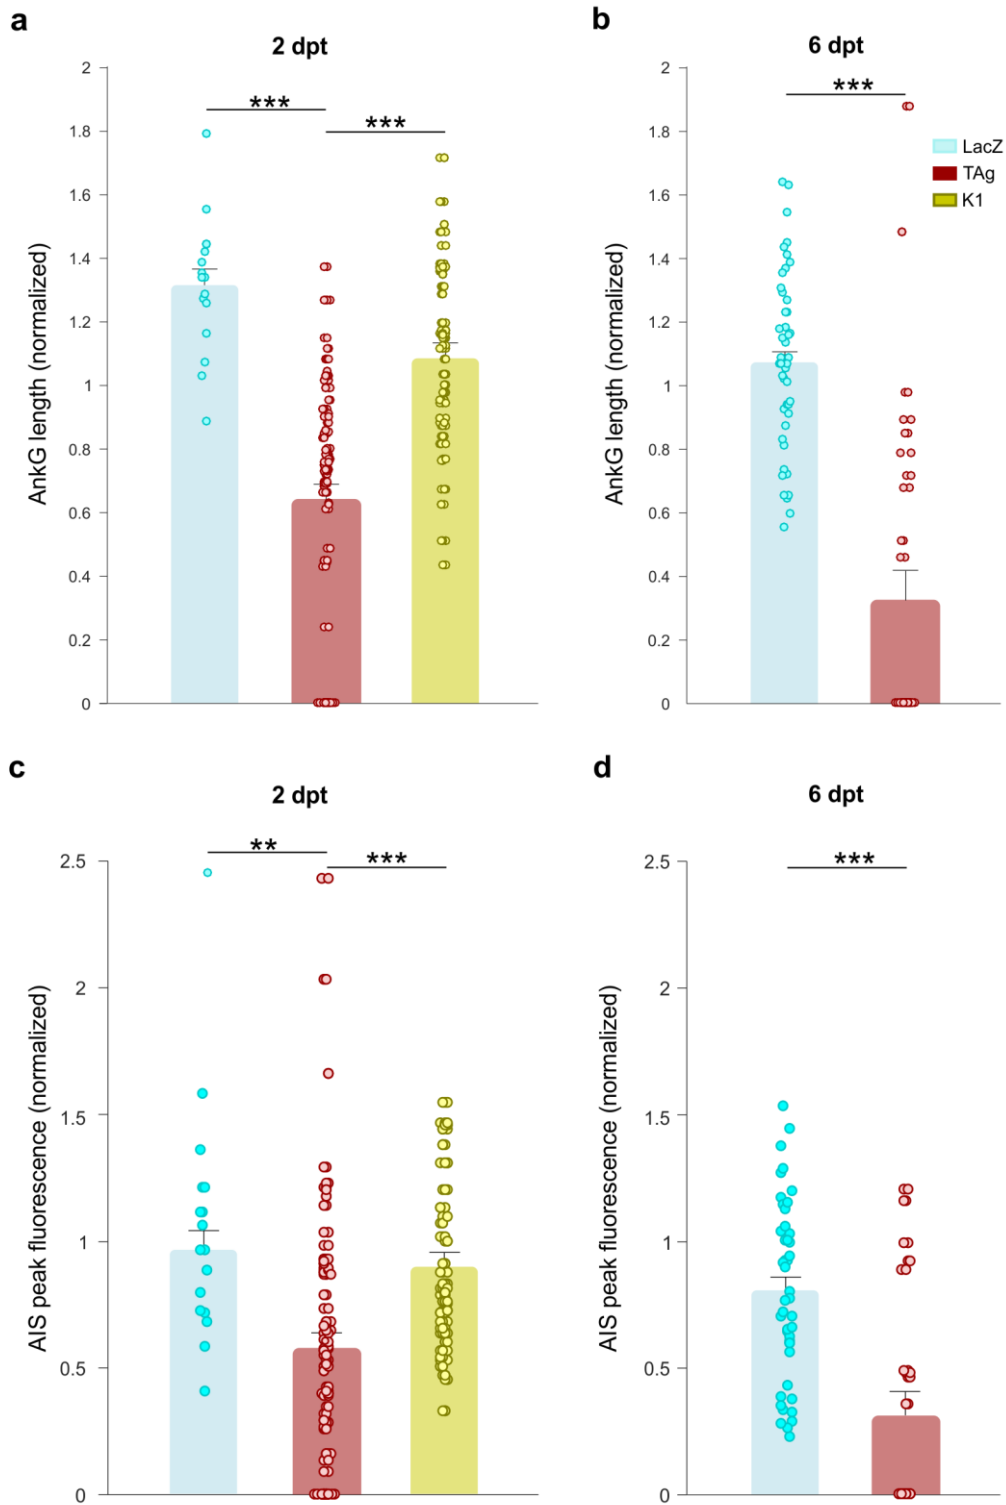

**Figure S3. Hyperploidy results in progressive AIS shortening in cortical neurons.**

(a-b) Average AIS length of transfected neurons, normalized respectively to the average AIS length of non-transfected neurons from the same cultures, at 2 dpt (a) and 6 dpt (b).

Each dot represents the normalized AIS length for a single transfected-positive nucleus.

**(c-d)** Average AIS PFV of transfected neurons, normalized respectively to the AIS PFV of non-transfected neurons from the same cultures, at 2 dpt **(c)** and 6 dpt **(d)**. Each dot represents the normalized AIS PFV for a single transfected-positive nucleus. \* $p < 0.05$ ; \*\* $p < 0.01$ ; \*\*\* $p < 0.001$ . Error bars indicate SEM.
